# Supplementary material for: Technical note: Coupling infrared gas analysis and cavity ring down spectroscopy for autonomous, high-temporal-resolution measurements of DIC and δ 13 C–DIC
Source: Copernicus journal article supplement (doi:10.5194/bg-14-1305-2017), 2017-03-15
Supplement: Supplementary file [file bg-14-1305-2017-supplement-title-page.pdf › bg-14-1305-2017-supplement-title-page.pdf]

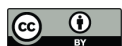

## *Supplement of*

# **Technical note: Coupling infrared gas analysis and cavity ring down spectroscopy for autonomous, high-temporal-resolution measurements of DIC and $\delta^{13}\text{C}$ -DIC**

**Mitchell Call et al.**

*Correspondence to:* Mitchell Call ([m.call.10@student.scu.edu.au](mailto:m.call.10@student.scu.edu.au))

- [bg-14-1305-2017-supplement-title-page.pdf](#)
- [Call\\_et\\_al\\_Biogeosciences\\_SI\\_PICARRO.csv](#)
- [Call\\_et\\_al\\_Biogeosciences\\_SI\\_Revised\\_Final.docx](#)
- [Fig\\_S1.TIF](#)
- [Fig\\_S2\\_revised.TIF](#)

The copyright of individual parts of the supplement might differ from the CC-BY 3.0 licence.
